# Supplementary material for: Generation of a Triple-Transgenic Zebrafish Line for Assessment of Developmental Neurotoxicity during Neuronal Differentiation
Source: Pharmaceuticals (Basel). 2019 Sep 24;12(4):145. doi: 10.3390/ph12040145 (PMC6958351; doi:10.3390/ph12040145)
Supplement: Supplementary file 1 [file pharmaceuticals-12-00145-s001.xlsx]

## Sheet: Col Stats of CFP area
Supplemental Table 1. Summary of in vivo fluorescence imaging of Tg (eno2: Cerulean, gfap:mCherry, mbp:mCitrine) zebrafish in this study
		CNT	VPA	TSA	CBZ	NCT	BPA	MeHg	RA	CPF	CPM	DEX	SAC	APAP	DFX
	Number of zebrafish	77	19	9	8	20	13	8	4	9	9	8	7	7	5
	MTC (µM)		100	0.1	100	100	20	0.1	0.001	10	0.1	100	100	1000	1000
CFP	Mean	1	0.8808	0.6915	0.7793	0.815	0.8342	1.033	1.056	0.8595	0.8376	1.084	1.065	1.033	1.02
	Lower 95% CI of mean	0.9723	0.7968	0.5861	0.6783	0.7292	0.7639	0.8456	0.9804	0.6675	0.7143	0.9959	0.983	0.9123	0.8897
	Upper 95% CI of mean	1.028	0.9648	0.7968	0.8802	0.9008	0.9045	1.221	1.132	1.052	0.9608	1.173	1.147	1.155	1.15
	p value (vs CNT)		0.0634	<0.0001	0.0035	0.0002	0.0057	>0.9999	>0.9999	0.0223	0.1056	>0.9999	>0.9999	>0.9999	>0.9999
RFP	Mean	1	1.275	1.566	1.168	0.8934	0.7779	1.063	0.8245	0.9406	0.9984	1.046	0.9975	1.171	1.101
	Lower 95% CI of mean	0.9493	1.169	1.272	0.9906	0.7868	0.7079	0.912	0.6934	0.7955	0.8695	0.9847	0.8405	1.03	0.9708
	Upper 95% CI of mean	1.051	1.382	1.86	1.345	1	0.8478	1.215	0.9556	1.086	1.127	1.107	1.155	1.313	1.232
	p value (vs CNT)		0.0007	0.0014	0.7012	0.4321	0.0027	>0.9999	0.7493	>0.9999	>0.9999	>0.9999	>0.9999	0.6525	>0.9999
YFP	Mean	1	0.2526	0.02244	0.1651	0.4387	0.8638	1.52	1.06	0.4748	0.614	1.088	1.091	1.256	1.141
	Lower 95% CI of mean	0.8845	0.1236	-0.02778	0.0115	0.1855	0.5907	0.6286	0.7179	0.2657	0.3815	0.7851	0.845	0.6578	0.8231
	Upper 95% CI of mean	1.115	0.3816	0.07266	0.3187	0.692	1.137	2.412	1.402	0.6839	0.8464	1.392	1.337	1.854	1.459
	p value (vs CNT)		<0.0001	<0.0001	0.0004	0.0003	>0.9999	>0.9999	>0.9999	0.1188	0.8987	>0.9999	>0.9999	>0.9999	>0.9999
RFP/CFP	Mean	1.012	1.48	2.359	1.531	1.147	0.9465	1.073	0.78	1.118	1.211	0.9684	0.938	1.142	1.092
	Lower 95% CI of mean	0.9533	1.352	1.728	1.221	0.9564	0.8436	0.8054	0.6867	0.9958	1.064	0.9128	0.8093	1.004	0.8657
	Upper 95% CI of mean	1.07	1.608	2.991	1.842	1.338	1.049	1.341	0.8733	1.239	1.358	1.024	1.067	1.279	1.318
	p value (vs CNT)		<0.0001	<0.0001	0.0029	>0.9999	>0.9999	>0.9999	0.4593	>0.9999	0.3034	>0.9999	>0.9999	>0.9999	>0.9999
YFP/CFP	Mean	0.9894	0.2657	0.04698	0.2002	0.5164	1.004	1.396	1.003	0.524	0.6996	1.004	1.022	1.193	1.112
	Lower 95% CI of mean	0.8821	0.1468	-0.05932	0.02499	0.2359	0.7231	0.71	0.6949	0.3596	0.5063	0.7311	0.8129	0.6605	0.9022
	Upper 95% CI of mean	1.097	0.3847	0.1533	0.3754	0.7968	1.286	2.082	1.312	0.6883	0.8929	1.277	1.232	1.726	1.322
	p value (vs CNT)		<0.0001	<0.0001	0.0005	0.0013	>0.9999	>0.9999	>0.9999	0.1115	>0.9999	>0.9999	>0.9999	>0.9999	>0.9999
YFP/RFP	Mean	1.064	0.1997	0.01234	0.1398	0.5352	1.11	1.394	1.295	0.4837	0.6084	1.033	1.088	1.084	1.042
	Lower 95% CI of mean	0.9159	0.1023	-0.01493	0.01188	0.2272	0.7701	0.6241	0.8266	0.3117	0.3824	0.7652	0.9413	0.5278	0.732
	Upper 95% CI of mean	1.211	0.2972	0.0396	0.2676	0.8432	1.45	2.163	1.764	0.6556	0.8343	1.301	1.235	1.641	1.353
	p value (vs CNT)		<0.0001	<0.0001	0.0003	0.0029	>0.9999	>0.9999	>0.9999	0.1542	0.8253	>0.9999	>0.9999	>0.9999	>0.9999
